# Supplementary material for: Presentation, Clinical Profile, and Prognosis of Young Patients With Myocardial Infarction With Nonobstructive Coronary Arteries (MINOCA): Results From the VIRGO Study
Source: PubMed Central journal article supplement — J Am Heart Assoc. 2018 Jun 28;7(13):e009174. doi: 10.1161/JAHA.118.009174 (PMC6064896; doi:10.1161/jaha.118.009174), 2018-06-28

# **SUPPLEMENTAL MATERIAL**

**Table S1. Sex-specific comparison of sociodemographic and clinical profile of patients with MINOCA.**

|                                                        | MINOCA<br>N= 299       |                       |
|--------------------------------------------------------|------------------------|-----------------------|
|                                                        | Women<br>N=269 (%)     | Men<br>N=30 (%)       |
| <b>Demographics</b>                                    |                        |                       |
| Age, in years;<br>Median (IQR)                         | 46.0<br>(40.0 – 51.0)  | 47.0<br>(41.0 – 52.0) |
| White                                                  | 179 (66.5%)            | 24 (80.0%)            |
| Hispanic origin                                        | 26 (9.7%)              | 5 (16.7%)             |
| <b>Risk Factors – Conventional</b>                     |                        |                       |
| Hypertension                                           | 148 (55.0%)            | 16 (53.3%)            |
| Diabetes                                               | 50 (18.6%)             | 2 (6.7%)              |
| Dyslipidemia                                           | 147 (54.6%)            | 17 (56.7%)            |
| Smoking in past 30 days                                | 091 (33.8%)            | 12 (40.0%)            |
| Obesity                                                | 114 (42.4%)            | 12 (40.0%)            |
| Family history of CAD                                  | 168 (62.4%)            | 16 (53.3%)            |
| Any of above cardiac risk factor                       | 246 (91.4%)            | 27 (90.0%)            |
| Stroke/TIA                                             | 9 (3.3%)               | 0 (0.0%)              |
| Prior AMI                                              | 32 (11.9%)             | 5 (16.7%)             |
| Congestive heart failure                               | 12 (4.5%)              | 1 (3.3%)              |
| Prior angina                                           | 59 (22.0%)             | 4 (13.3%)             |
| <b>Risk Factors - Unconventional</b>                   |                        |                       |
| Depression                                             | 77 (29.5%)             | 6 (20.7%)             |
| Perceived Stress;<br>Median (IQR)                      | 26.0*<br>(20.0 – 33.0) | 21.0<br>(13.0 – 27.0) |
| Cocaine Use                                            | 17 (6.3%)              | 1 (3.3%)              |
| Hypercoagulability Syndrome                            | 9 (3.3%)               | 0 (0.0%)              |
| Venous thromboembolism                                 | 10 (3.7%)              | 1 (3.3%)              |
| Autoimmune disease                                     | 12 (4.5%)              | 0 (0.0%)              |
| Renal dysfunction                                      | 25 (9.3%)              | 2 (6.7%)              |
| Thyroid conditions                                     | 28 (10.4%)             | 1 (3.3%)              |
| <b>Diagnosis</b>                                       |                        |                       |
| Pre-hospital ECG                                       | 60 (22.4%)             | 4 (13.3%)             |
| Discharge diagnosis                                    |                        |                       |
| STEMI                                                  | 58 (21.6%)             | 6 (20.0%)             |
| NSTEMI                                                 | 211 (78.4%)            | 24 (80.0%)            |
| Length of Hospital Stay, in days;<br>Median (IQR)      | 3.0 (2.0 – 4.0)        | 2.0 (2.0 – 4.0)       |
| <b>Severity of Disease</b>                             |                        |                       |
| Peak troponin;<br>Median (IQR)                         | 3.3 (1.1 – 11.0)       | 3.3 (1.1 – 10.3)      |
| Ejection fraction <40%                                 | 27 (10.1%)             | 2 (6.7%)              |
| <b>Interventions</b>                                   |                        |                       |
| PCI                                                    | 29 (10.8%)             | 5 (16.7%)             |
| CABG                                                   | 5 (1.9%)               | 0 (0.0%)              |
| AICD                                                   | 4 (50.0%)              | 0 (0.0%)              |
| <b>Discharge Management<br/>(of eligible patients)</b> |                        |                       |
| Aspirin                                                | 238 (93.3%)            | 28 (96.5%)            |
| Beta blockers                                          | 188 (84.7%)            | 25 (96.1%)            |
| ACE inhibitors or ARB                                  | 120 (50.0%)            | 14 (51.8%)            |

|                                                 |             |            |
|-------------------------------------------------|-------------|------------|
| Statin                                          | 180 (72.6%) | 22 (81.5%) |
| Cardiac rehabilitation                          |             |            |
| Referred on discharge                           | 88 (32.7%)  | 9 (30.0%)  |
| Reported referral at 1-month post-AMI follow-up | 116 (47.4%) | 11 (39.3%) |

- p values not calculated given low numbers in this group

IQR: Interquartile Range; CAD: Coronary Artery Disease; AMI: Acute Myocardial Infarction; PAD: Peripheral Arterial Disease; TIA: Transient Ischemic Attack; PCI: Percutaneous Intervention; CABG: Coronary Artery Bypass Graft; AICD= automatic implantable cardioverter-defibrillator; ACE inhibitor: Angiotensin Converting Enzyme inhibitor; ARB: Angiotensin Receptor II Blocker; STEMI: ST-Elevation Myocardial Infarction; NSTEMI: Non-ST Elevation Myocardial Infarction; ECG: Electrocardiogram; MI-CAD: Myocardial Infarction due to Coronary Artery Disease; MINOCA: Myocardial Infarction with Non-Obstructive Coronary Arteries;

**Table S2. Sequential Linear Regression Results for the Relationship Between Type of MI (MINOCA or MI-CAD) and Quality of life at 12-months.**

| Model Number | Quality of Life at 12-months (95% CI) | P values                                              | Covariates Included in the Model                                                                                                                                                                                                                                                                                                                                                                                                                                                            |
|--------------|---------------------------------------|-------------------------------------------------------|---------------------------------------------------------------------------------------------------------------------------------------------------------------------------------------------------------------------------------------------------------------------------------------------------------------------------------------------------------------------------------------------------------------------------------------------------------------------------------------------|
| 1            | 3.41<br>(0.29, 6.54)                  | 0.0322<br>(unadjusted)                                | Type of AMI (MINOCA vs MICAD)                                                                                                                                                                                                                                                                                                                                                                                                                                                               |
| 2            | 5.71<br>(2.62, 8.81)                  | 0.0003<br>(above plus sociodemographics)              | Type of AMI, <b>age, sex, race, ethnicity, marital status</b>                                                                                                                                                                                                                                                                                                                                                                                                                               |
| 3            | 4.87<br>(1.85, 7.90)                  | 0.0016<br>(above plus socioeconomics)                 | Type of AMI, age, sex, race, ethnicity, marital status, <b>education level, employment status, insurance status</b>                                                                                                                                                                                                                                                                                                                                                                         |
| 4            | 4.03<br>(0.90, 7.15)                  | 0.0115<br>(above plus cardiac risk factors)           | Type of AMI, age, sex, race, ethnicity, marital status, education level, employment status, insurance status, <b>current smoking, hypertension, diabetes, dyslipidemia, obesity</b>                                                                                                                                                                                                                                                                                                         |
| 5            | 3.81<br>(0.69, 6.93)                  | 0.0167<br>(above plus other cardiovascular illnesses) | Type of AMI, age, sex, race, ethnicity, marital status, education level, employment status, insurance status, current smoking, hypertension, diabetes, dyslipidemia, obesity, <b>prior AMI, prior stroke/TIA, prior angina, prior revascularization, peripheral arterial disease, congestive heart failure, renal dysfunction</b>                                                                                                                                                           |
| 6            | 4.05<br>(0.96, 7.13)                  | 0.0102<br>(above plus noncardiac illnesses)           | Type of AMI, age, sex, race, ethnicity, marital status, education level, employment status, insurance status, current smoking, hypertension, diabetes, dyslipidemia, obesity, prior AMI, prior stroke/TIA, prior angina, prior revascularization, peripheral arterial disease, congestive heart failure, renal dysfunction, <b>COPD, autoimmune conditions, history of illicit drug use, history of depression or cancer.</b>                                                               |
| 7            | 4.06<br>(0.91, 7.21)                  | 0.0115<br>(above plus severity of MI)                 | Type of AMI, age, sex, race, ethnicity, marital status, education level, employment status, insurance status, current smoking, hypertension, diabetes, dyslipidemia, obesity, prior AMI, prior stroke/TIA, prior angina, prior revascularization, peripheral arterial disease, congestive heart failure, renal dysfunction, COPD, autoimmune conditions, history of illicit drug use, history of depression or cancer, <b>peak troponin, grace score, STEMI, reduced ejection fraction.</b> |
| 8            | 3.08<br>(0.11, 6.27)                  | 0.0586<br>(above plus psychosocial factors)           | Type of AMI, age, sex, race, ethnicity, marital status, education level, employment status, insurance status, current smoking, hypertension, diabetes, dyslipidemia, obesity, prior AMI, prior stroke/TIA, prior angina, prior revascularization, peripheral                                                                                                                                                                                                                                |

|  |  |  |                                                                                                                                                                                                                                                                                                |
|--|--|--|------------------------------------------------------------------------------------------------------------------------------------------------------------------------------------------------------------------------------------------------------------------------------------------------|
|  |  |  | arterial disease, congestive heart failure, renal dysfunction, COPD, autoimmune conditions, history of illicit drug use, history of depression or cancer, peak troponin, grace score, STEMI, reduced ejection fraction, <b>baseline SAQ angina frequency, baseline perceived stress score.</b> |
|--|--|--|------------------------------------------------------------------------------------------------------------------------------------------------------------------------------------------------------------------------------------------------------------------------------------------------|

Abbreviations: CI, Confidence Interval; AMI, Acute Myocardial Infarction; MINOCA, Myocardial infarction with no obstructive coronary artery; MI-CAD, myocardial infarction with coronary artery disease; PCI, percutaneous coronary intervention; CABG, coronary artery bypass graft; TIA, transient ischemic attack; COPD, chronic obstructive pulmonary disease; STEMI, ST-elevation myocardial infarction; SAQ, Seattle Angina Questionnaire; STEMI, ST-elevation myocardial infarction

**Table S3. Risk Factor Profile and Clinical Characteristics in Patients with MINOCA and a) history of heart failure and b) low ejection fraction (<40%).**

|                               | History of congestive heart failure |                               | Reduced Ejection Fraction during Index Hospitalization |                                 |
|-------------------------------|-------------------------------------|-------------------------------|--------------------------------------------------------|---------------------------------|
|                               | <b>N</b><br>( <b>N = 283</b> )      | <b>Y</b><br>( <b>N = 13</b> ) | <b>No</b><br>( <b>N = 266</b> )                        | <b>Yes</b><br>( <b>N = 29</b> ) |
| Median age in years (IQR)     | 46.0 (40.0 – 51.0)                  | 50.0 (41.0 – 52.0)            | 46.0 (40.0 – 51.0)                                     | 50.0 (41.0 – 54.0)              |
| Women                         | 255 ( 90.11%)                       | 12 ( 92.31%)                  | 239 (89.85%)                                           | 27 (93.10%)                     |
| Race                          |                                     |                               |                                                        |                                 |
| Black / African American      | 62 ( 21.91%)                        | 7 ( 53.85%)                   | 61 (22.93%)                                            | 7 (24.14%)                      |
| White / Caucasian             | 195 ( 68.90%)                       | 5 ( 38.46%)                   | 179 (67.29%)                                           | 21 (72.41%)                     |
| Other                         | 14 ( 9.19%)                         | 1 ( 7.69%)                    | 26 (8.78%)                                             | 1 ( 3.45%)                      |
| Hispanic                      | 29 ( 10.25%)                        | 2 ( 15.38%)                   | 29 (10.90%)                                            | 2 ( 6.90%)                      |
| Hypertension                  | 149 ( 52.65%)                       | 13 (100.00%)                  | 143 (53.76%)                                           | 18 (62.07%)                     |
| Diabetes                      | 41 ( 14.49%)                        | 10 ( 76.92%)                  | 42 (15.79%)                                            | 8 (27.59%)                      |
| Dyslipidemia                  | 151 ( 53.36%)                       | 11 ( 84.62%)                  | 142 (53.38%)                                           | 19 (65.52%)                     |
| Current smoker                | 99 ( 34.98%)                        | 4 ( 30.77%)                   | 92 (34.59%)                                            | 11 (37.93%)                     |
| Obese                         | 115 ( 40.64%)                       | 9 ( 69.23%)                   | 114 (42.86%)                                           | 10 (34.48%)                     |
| Troponin maximum Median (IQR) | 3.5 (1.3 – 11.1)                    | 1.0 (0.2 – 1.2)               | 3.4 (1.2 – 10.5)                                       | 1.7 (1.0 – 31.5)                |

IQR: Interquartile range

**Table S4. Clinical Characteristics and Outcomes in patients with MI-CAD versus indeterminate cause (Class V).**

|                                                 | Obstructive CAD<br>N=2,411 (89.8%) | Indeterminate Cause<br>N=17 (0.6%) |
|-------------------------------------------------|------------------------------------|------------------------------------|
| <b>Demographics</b>                             |                                    |                                    |
| Age, in years;<br>Median (IQR)                  | 48<br>(44, 52)                     | 50<br>(44, 52)                     |
| Women                                           | 1,574 (65.3)                       | 15 (88.2)                          |
| White                                           | 1,853 (76.9)                       | 9 (52.9)                           |
| Hispanic origin                                 | 175 (7.3)                          | 1 (5.9)                            |
| <b>Risk Factors – Conventional</b>              |                                    |                                    |
| Hypertension                                    | 1,608 (66.7)                       | 12 (70.6)                          |
| Diabetes                                        | 752 (31.2)                         | 3 (17.7)                           |
| Dyslipidemia                                    | 1,676 (69.5)                       | 13 (76.5)                          |
| Smoking in past 30 days                         | 1,440 (59.8)                       | 9 (52.9)                           |
| Obesity                                         | 1,296 (53.8)                       | 7 (41.2)                           |
| Family history of CAD                           | 1,804 (74.9)                       | 12 (70.6)                          |
| Stroke/TIA                                      | 112 (4.7)                          | 3 (17.7)                           |
| Prior AMI                                       | 523 (21.7)                         | 8 (47.1)                           |
| Congestive heart failure                        | 107 (4.4)                          | 1 (5.9)                            |
| <b>Severity of Disease</b>                      |                                    |                                    |
| Peak troponin;<br>Median (IQR)                  | 7.7<br>(1.6, 29.7)                 | 3.4<br>(1.0, 12.7)                 |
| Ejection fraction <40%                          | 273 (11.7)                         | 0 (0)                              |
| Discharge diagnosis                             |                                    |                                    |
| STEMI                                           | 1,257 (52.1)                       | 3 (17.7)                           |
| NSTEMI                                          | 1,154 (47.9)                       | 14 (82.4)                          |
| <b>Interventions</b>                            |                                    |                                    |
| PCI (of patients eligible n=1,139)              | 1,050 (93.3)                       | 0 (0)                              |
| CABG                                            | 253 (10.6)                         | 0 (0)                              |
| Pacemaker (of patients eligible n=50)           | 26 (63.4)                          | 0 (0)                              |
| Defibrillator (of patients eligible n=47)       | 14 (36.8)                          | 1 (100)                            |
| <b>Discharge Management</b>                     |                                    |                                    |
| Aspirin                                         | 2,351 (98.7)                       | 17 (100)                           |
| Beta blockers                                   | 2,253 (98.3)                       | 13 (92.9)                          |
| ACE inhibitors or ARB                           | 1,594 (73.2)                       | 9 (52.9)                           |
| Statin                                          | 2,284 (96.7)                       | 16 (100)                           |
| Cardiac rehab                                   |                                    |                                    |
| Referred on discharge                           | 1,171 (48.6)                       | 4 (23.5)                           |
| Reported referral at 1-month post-AMI follow-up | 1,438 (65.3)                       | 5 (33.3)                           |
| <b>Outcomes</b>                                 |                                    |                                    |
| <b>Mortality; N(%)</b>                          |                                    |                                    |
| In-hospital mortality                           | 4 (0.2)                            | 0 (0)                              |
| 1-month mortality                               | 14 (0.6)                           | 0 (0)                              |
| 12-months mortality                             | 53 (2.3)                           | 0 (0)                              |

IQR: Interquartile Range; CAD: Coronary Artery Disease; AMI: Acute Myocardial Infarction; PAD: Peripheral Arterial Disease; TIA: Transient Ischemic Attack; PCI: Percutaneous Intervention; CABG: Coronary Artery Bypass Graft; AICD= automatic implantable cardioverter-defibrillator; ACE inhibitor: Angiotensin Converting Enzyme inhibitor; ARB: Angiotensin Receptor II Blocker; STEMI: ST-Elevation Myocardial Infarction; NSTEMI: Non-ST Elevation Myocardial Infarction; ECG: Electrocardiogram; OCP: Oral Contraceptives; MI-CAD: Myocardial Infarction due to Coronary Artery Disease; MINOCA: Myocardial Infarction with Non-Obstructive Coronary Arteries

Figure S1. Flow of patients through the VIRGO study.

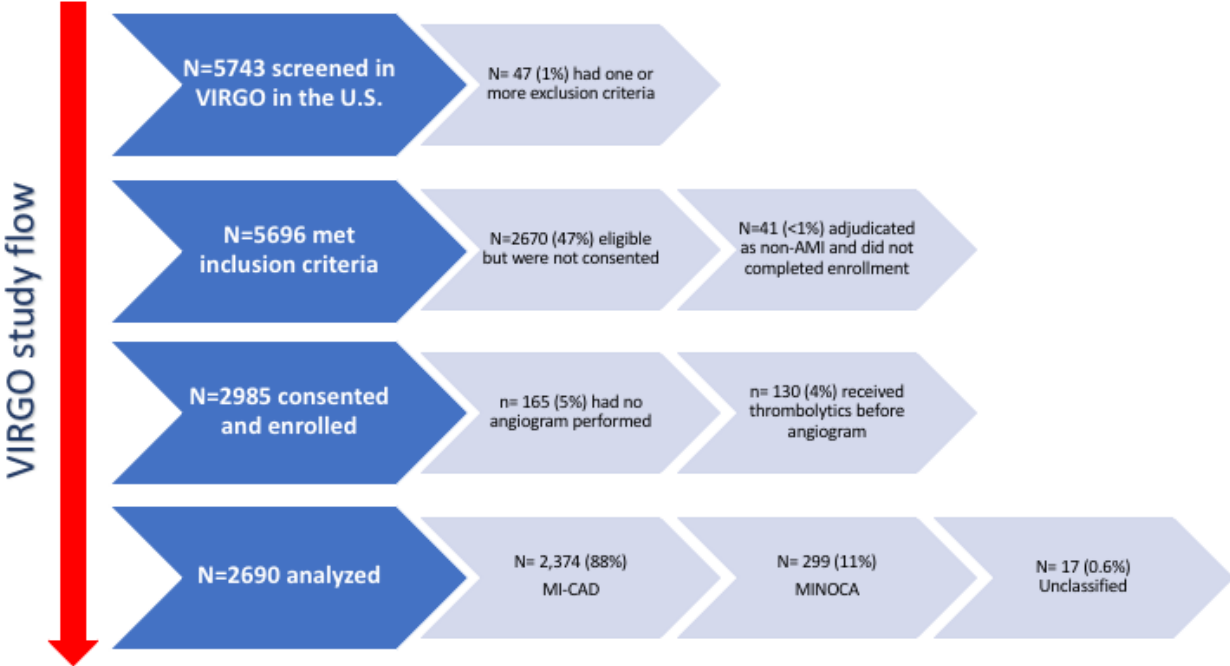

Supplement: JAH3-7-e009174-s001.pdf [file JAH3-7-e009174-s001.pdf]
